# Supplementary material for: Targeted re-sequencing of F8, F9 and VWF: Characterization of Ion Torrent data and clinical implications for mutation screening
Source: PLoS One. 2019 Apr 26;14(4):e0216179. doi: 10.1371/journal.pone.0216179 (PMC6485758; doi:10.1371/journal.pone.0216179)
Supplement: S1 Table — (XLSX) [file pone.0216179.s001.xlsx]

## Sheet: MutationsIndividuals
S1 Table. Identified variants with all annotation from all individuals.
feature	chr	pos	ref	alt	129	130	132	135	136	138	139	140	HA_208	HA_365	HA_398	HA_408	HA_420	HA_432	HA_448	HA_459	VWF_140	VWF_159	VWF_166	VWF_172	VWF_189	VWF_238	VWF_25	VWF_280	VWF_92	Allele	Consequence	IMPACT	SYMBOL	Gene	Feature_type	Feature	BIOTYPE	EXON	INTRON	HGVSc	HGVSp	cDNA_position	CDS_position	Protein_position	Amino_acids	Codons	Existing_variation	STRAND	SYMBOL_SOURCE
VWF	chr12	6061588	G	C	0	0	0	0.501901	0	0	0	0	0	0	0	0	0	0	0	0	0	0	0	0	0	0	0	0	0	C	missense_variant	MODERATE	VWF	ENSG00000110799	Transcript	ENST00000261405	protein_coding	49/52		ENST00000261405.5:c.8084C>G	ENSP00000261405.5:p.Pro2695Arg	8339	8084	2695	P/R	cCc/cGc	rs76459136&COSM213831	-1	HGNC
VWF	chr12	6062708	G	A	0	0	0	0	0	0.464327	0	0	0	0	0	0	0	0	0	0	0	0	0	0	0	0	0	0	0	A	missense_variant	MODERATE	VWF	ENSG00000110799	Transcript	ENST00000261405	protein_coding	48/52		ENST00000261405.5:c.7940C>T	ENSP00000261405.5:p.Thr2647Met	8195	7940	2647	T/M	aCg/aTg	rs61751302&CM070307&COSM357715	-1	HGNC
VWF	chr12	6078503	G	A	0	0	0	0	0	0	0	0	0	0	0	0	0	0	0	0	0	0	0.49305	0	0	0	0	0	0	A	stop_gained	HIGH	VWF	ENSG00000110799	Transcript	ENST00000261405	protein_coding	45/52		ENST00000261405.5:c.7603C>T	ENSP00000261405.5:p.Arg2535Ter	7858	7603	2535	R/*	Cga/Tga	rs61751296&CM910408	-1	HGNC
VWF	chr12	6085284	C	G	0	0	0	0	0	0	0	0	0	0	0	0	0	0	0	0	0	0	0	0	0	0	0	0.777778	0	G	missense_variant	MODERATE	VWF	ENSG00000110799	Transcript	ENST00000261405	protein_coding	43/52		ENST00000261405.5:c.7430G>C	ENSP00000261405.5:p.Cys2477Ser	7685	7430	2477	C/S	tGt/tCt	rs61751289&CM070355&CM070356&VWF_c.7430G>C	-1	HGNC
VWF	chr12	6125257	T	C	0	0	0	0	0	0	0	0	0	0	0	0	0	0	0	0.506757	0	0	0	0	0	0	0	0	0	C	missense_variant&splice_region_variant	MODERATE	VWF	ENSG00000110799	Transcript	ENST00000261405	protein_coding	31/52		ENST00000261405.5:c.5453A>G	ENSP00000261405.5:p.Asn1818Ser	5708	5453	1818	N/S	aAc/aGc	rs61750608&CM070302	-1	HGNC
VWF	chr12	6127570	C	T	0	0	0	0	0	0	0	0	0	0	0	0	0	0	0	0	0.472274	0	0	0	0	0	0	0	0	T	missense_variant	MODERATE	VWF	ENSG00000110799	Transcript	ENST00000261405	protein_coding	28/52		ENST00000261405.5:c.5014G>A	ENSP00000261405.5:p.Gly1672Arg	5269	5014	1672	G/R	Gga/Aga	rs61750598&CM961449	-1	HGNC
VWF	chr12	6127609	G	A	0	0	0	0	0	0	0	0	0	0	0	0	0	0	0	0	0	0	0	0.504717	0	0	0	0	0	A	stop_gained	HIGH	VWF	ENSG00000110799	Transcript	ENST00000261405	protein_coding	28/52		ENST00000261405.5:c.4975C>T	ENSP00000261405.5:p.Arg1659Ter	5230	4975	1659	R/*	Cga/Tga	rs61750595&CM920715&COSM1990391	-1	HGNC
VWF	chr12	6128067	G	A	0	0	0	0	0	0	0	0	0	0	0	0	0	0	0	0	0	0	0	0	0.486396	0	0	0	0	A	missense_variant	MODERATE	VWF	ENSG00000110799	Transcript	ENST00000261405	protein_coding	28/52		ENST00000261405.5:c.4517C>T	ENSP00000261405.5:p.Ser1506Leu	4772	4517	1506	S/L	tCg/tTg	rs61750100&CM930731	-1	HGNC
VWF	chr12	6128464	G	A	0	0	0	0	0	0	0	0	0	0	0	0	0	0	0	0	0	0.547826	0	0	0	0	0	0	0	A	missense_variant	MODERATE	VWF	ENSG00000110799	Transcript	ENST00000261405	protein_coding	28/52		ENST00000261405.5:c.4120C>T	ENSP00000261405.5:p.Arg1374Cys	4375	4120	1374	R/C	Cgc/Tgc	rs61750071&CM095103&CM951304&VWF_c.4120C>T	-1	HGNC
VWF	chr12	6155892	G	A	0	0	0	0	0	0	0	0	0	0	0	0	0	0	0	0	0	0	0	0	0	0.575	0	0	0	A	missense_variant	MODERATE	VWF	ENSG00000110799	Transcript	ENST00000261405	protein_coding	17/52		ENST00000261405.5:c.2278C>T	ENSP00000261405.5:p.Arg760Cys	2533	2278	760	R/C	Cgc/Tgc	rs61748466&CM030088&COSM5013852	-1	HGNC
F9	chrX	138613005	T	C	0	0	0.99284	0	0	0	0	0	0	0	0	0	0	0	0	0	0	0	0	0	0	0	0	0	0	C	missense_variant	MODERATE	F9	ENSG00000101981	Transcript	ENST00000218099	protein_coding	2019-01-08		ENST00000218099.2:c.82T>C	ENSP00000218099.2:p.Cys28Arg	89	82	28	C/R	Tgt/Cgt	rs387906481&CM001676&CM940506	1	HGNC
F9	chrX	138613006	G	A	0	0	0	0	0	0	0	0.997483	0	0	0	0	0	0	0	0	0	0	0	0	0	0	0	0	0	A	missense_variant	MODERATE	F9	ENSG00000101981	Transcript	ENST00000218099	protein_coding	2019-01-08		ENST00000218099.2:c.83G>A	ENSP00000218099.2:p.Cys28Tyr	90	83	28	C/Y	tGt/tAt	CD961994&CM010301&COSM4761865	1	HGNC
F9	chrX	138630589	G	A	0	0	0	0	0.990562	0	0	0	0	0	0	0	0	0	0	0	0	0	0	0	0	0	0	0	0	A	synonymous_variant	LOW	F9	ENSG00000101981	Transcript	ENST00000218099	protein_coding	2019-05-08		ENST00000218099.2:c.459G>A	ENSP00000218099.2:p.Val153%3D	466	459	153	V	gtG/gtA	rs144314232&CM082667&CS910603	1	HGNC
F9	chrX	138633272	G	A	0	0.995495	0	0	0	0	0	0	0	0	0	0	0	0	0	0	0	0	0	0	0	0	0	0	0	A	missense_variant	MODERATE	F9	ENSG00000101981	Transcript	ENST00000218099	protein_coding	2019-06-08		ENST00000218099.2:c.572G>A	ENSP00000218099.2:p.Arg191His	579	572	191	R/H	cGt/cAt	rs137852238&CM940534&CM940535&CM960584	1	HGNC
F9	chrX	138642961	T	C	0	0	0	0.995717	0	0	0	0	0	0	0	0	0	0	0	0	0	0	0	0	0	0	0	0	0	C	missense_variant	MODERATE	F9	ENSG00000101981	Transcript	ENST00000218099	protein_coding	2019-07-08		ENST00000218099.2:c.785T>C	ENSP00000218099.2:p.Ile262Thr	792	785	262	I/T	aTt/aCt	CM940581	1	HGNC
F9	chrX	138643979	C	T	0	0	0	0	0	1	0	0	0	0	0	0	0	0	0	0	0	0	0	0	0	0	0	0	0	T	stop_gained	HIGH	F9	ENSG00000101981	Transcript	ENST00000218099	protein_coding	2019-08-08		ENST00000218099.2:c.1135C>T	ENSP00000218099.2:p.Arg379Ter	1142	1135	379	R/*	Cga/Tga	rs137852258&CM940662&CM940663	1	HGNC
F9	chrX	138644133	G	T	0	0	0	0	0	0	0.995122	0	0	0	0	0	0	0	0	0	0	0	0	0	0	0	0	0	0	T	missense_variant	MODERATE	F9	ENSG00000101981	Transcript	ENST00000218099	protein_coding	2019-08-08		ENST00000218099.2:c.1289G>T	ENSP00000218099.2:p.Ser430Ile	1296	1289	430	S/I	aGc/aTc	CM045752&CM940717&CM990580	1	HGNC
F8	chrX	154133279	G	A	0	0	0	0	0	0	0	0	0	0	0	0	0	0	0	0.984763	0	0	0	0	0	0	0	0	0	A	missense_variant	MODERATE	F8	ENSG00000185010	Transcript	ENST00000360256	protein_coding	16/26		ENST00000360256.4:c.5393C>T	ENSP00000353393.4:p.Ala1798Val	5594	5393	1798	A/V	gCc/gTc	CM083668	-1	HGNC
F8	chrX	154133291	A	T	0	0	0	0	0	0	0	0	0	0	0	0.998392	0	0	0	0	0	0	0	0	0	0	0	0	0	T	missense_variant	MODERATE	F8	ENSG00000185010	Transcript	ENST00000360256	protein_coding	16/26		ENST00000360256.4:c.5381T>A	ENSP00000353393.4:p.Phe1794Tyr	5582	5381	1794	F/Y	tTc/tAc	rs782123880&CD123967&CM1212747	-1	HGNC
F8	chrX	154158424	TG	T	0	0	0	0	0	0	0	0	0	0.456954	0	0	0	0	0	0	0	0	0	0	0	0	0	0	0	-	frameshift_variant	HIGH	F8	ENSG00000185010	Transcript	ENST00000360256	protein_coding	14/26		ENST00000360256.4:c.3640del	ENSP00000353393.4:p.Gln1214ArgfsTer4	3841	3640	1214	Q/X	Cag/ag	CM1212727	-1	HGNC
F8	chrX	154158424	TG	TA	0	0	0	0	0	0	0	0	0	0.540839	0	0	0	0	0	0	0	0	0	0	0	0	0	0	0	TA	stop_gained	HIGH	F8	ENSG00000185010	Transcript	ENST00000360256	protein_coding	14/26		ENST00000360256.4:c.3640delinsT	ENSP00000353393.4:p.Gln1214Ter	3841-3842	3640-3641	1214	Q/*	CAg/TAg		-1	HGNC
F8	chrX	154158930	TG	T	0	0	0	0	0	0	0	0	0	0	0	0	0	0	0.993135	0	0	0	0	0	0	0	0	0	0	-	frameshift_variant	HIGH	F8	ENSG00000185010	Transcript	ENST00000360256	protein_coding	14/26		ENST00000360256.4:c.3134del	ENSP00000353393.4:p.Pro1045HisfsTer8	3335	3134	1045	P/X	cCa/ca		-1	HGNC
F8	chrX	154197692	G	A	0	0	0	0	0	0	0	0	0	0	0	0	0	0.996874	0	0	0	0	0	0	0	0	0	0	0	A	missense_variant	MODERATE	F8	ENSG00000185010	Transcript	ENST00000360256	protein_coding	2019-07-26		ENST00000360256.4:c.923C>T	ENSP00000353393.4:p.Ser308Leu	1124	923	308	S/L	tCg/tTg	rs137852404&CM930213	-1	HGNC
F8	chrX	154250761	T	C	0	0	0	0	0	0	0	0	0	0	0.994389	0	0	0	0	0	0	0	0	0	0	0	0	0	0	C	missense_variant	MODERATE	F8	ENSG00000185010	Transcript	ENST00000360256	protein_coding	2019-01-26		ENST00000360256.4:c.67A>G	ENSP00000353393.4:p.Arg23Gly	268	67	23	R/G	Aga/Gga	CM0910937	-1	HGNC
[truncated: 43 more columns]
